# Supplementary material for: Multi-analyte, ratiometric and relay recognition of a 2,5-diphenyl-1,3,4-oxadiazole-based fluorescent sensor through modulating ESIPT
Source: Royal Society of Chemistry journal article supplement (doi:10.1039/c4ra16347h), 2015-01-01
Supplement: c4ra16347h1.pdf [file c4ra16347h1.pdf]

## ***Electronic Supplementary Information \_ESI***

### **Multi-analyte, ratiometric and relay recognition of a 2,5-diphenyl-1,3,4-oxadiazole-based fluorescent sensor through modulating ESIPT**

Lijun Tang<sup>\*a</sup>, Zhuxuan Zheng<sup>a</sup>, Zhenlong Huang<sup>a</sup>, Keli Zhong<sup>a</sup>, Yanjiang Bian<sup>a</sup>, and

Raju Nandhakumar<sup>\*b</sup>

<sup>a</sup>*Department of Chemistry, Liaoning Provincial Key Laboratory for the Synthesis and Application of Functional Compounds, Bohai University, Jinzhou 121013, China. E-mail: ljtang@bhu.edu.cn;*

<sup>b</sup>*Department of Chemistry, Karunya University, Karunya Nagar, Coimbatore - 641114.*

*TamilNadu, India, E-mail: rajunandha@gmail.com*

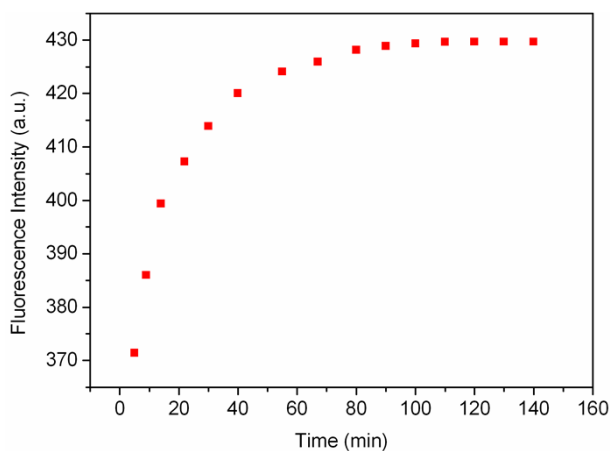

**Fig. S1.** Fluorescence intensity changes of **L** (10  $\mu$ M) in HEPES buffered (10 mM, pH = 7.4) water solution against time.

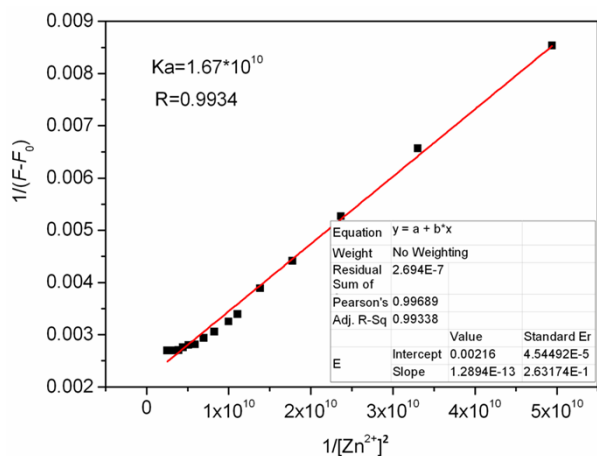

**Fig. S2.** Benesi-Hildebrand plot of **L** assuming 1:2 stoichiometry with  $\text{Zn}^{2+}$ .  $\lambda_{\text{em}} = 445 \text{ nm}$ .

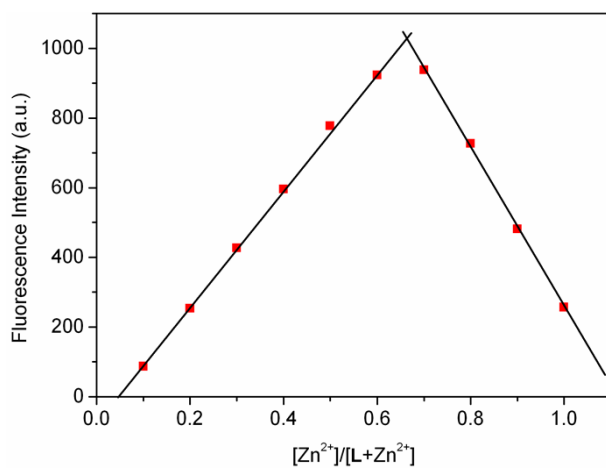

**Fig. S3.** Job's plot of **L** with  $\text{Zn}^{2+}$  (at 445 nm). The total concentration of **L** and  $\text{Zn}^{2+}$  is  $5.0 \times 10^{-5} \text{ M}$ .

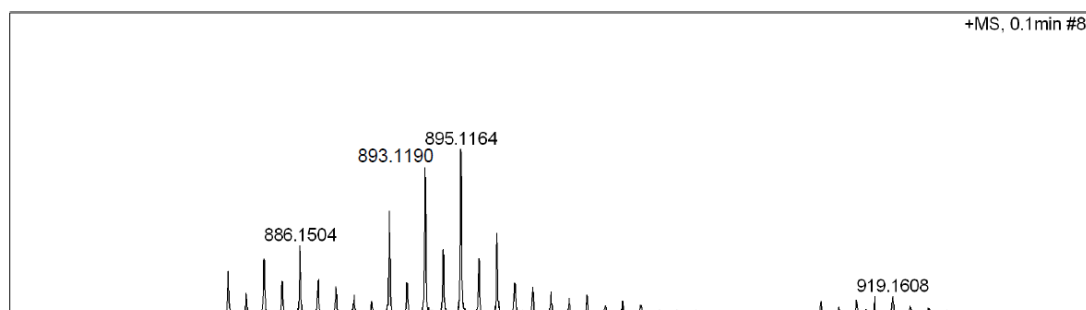

**Fig. S4.** HRMS spectrum of **L** in the presence of  $\text{Zn}^{2+}$ .

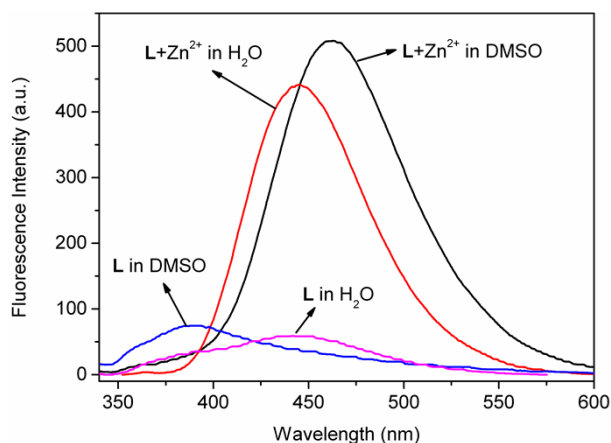

**Fig. S5.** Fluorescence spectra of **L** with and without  $\text{Zn}^{2+}$  in DMSO and water solution (HEPES 10 mM, pH = 7.4).

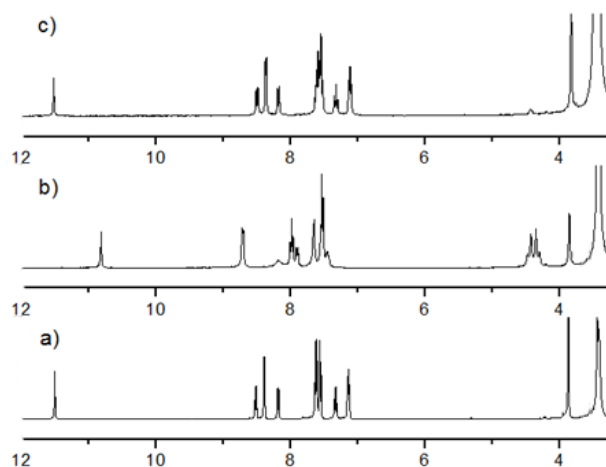

**Fig. S6.**  $^1\text{H}$  NMR spectrum of **L** (a), **L**+ $\text{Zn}^{2+}$  (b) and **L**+ $\text{Zn}^{2+}$ + $\text{S}^{2-}$  (c) in  $\text{DMSO}-d_6$ .

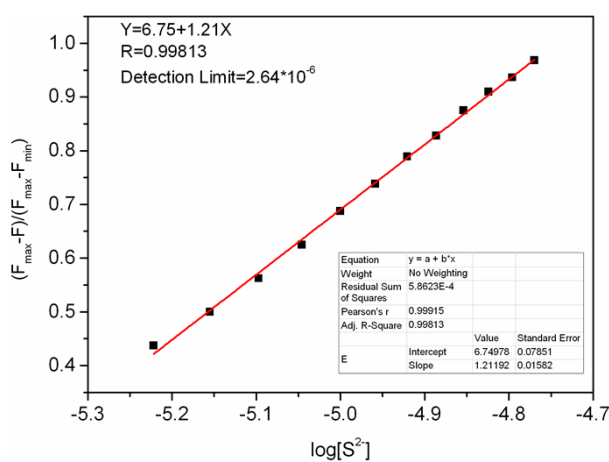

**Fig. S7.** Normalized fluorescence intensity  $(F - F_{\min}) / (F_{\max} - F_{\min})$  of **L**- $2\text{Zn}^{2+}$  ( $10 \mu\text{M}$ ) to  $\text{Log}[\text{S}^{2-}]$  in water solution (HEPES 10 mM, pH = 7.4).  $\lambda_{\text{em}} = 445 \text{ nm}$ .

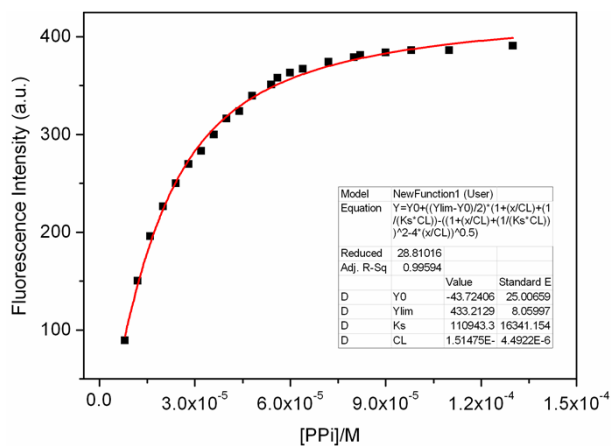

**Fig. S8.** Non-linear least squares fitting of fluorescence intensity of (at 396 nm) L-2Zn<sup>2+</sup> solution with different concentrations of PPI employing a 1:1 binding equation.

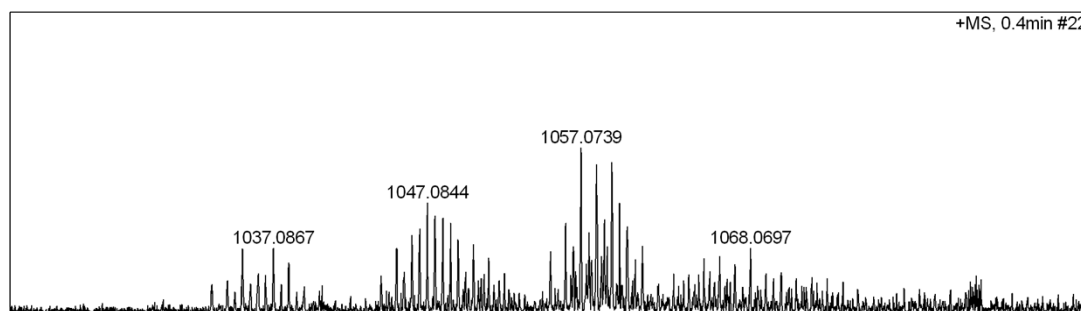

**Fig. S9.** HRMS spectrum of L-2Zn<sup>2+</sup> in the presence of PPI.

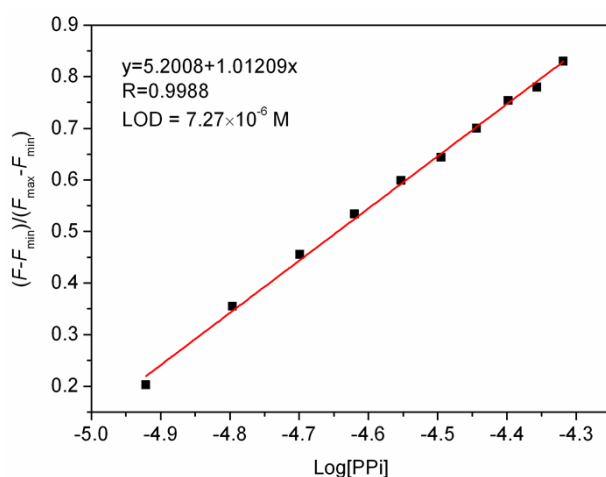

**Fig. S10.** Normalized fluorescence intensity  $(F-F_{\min})/(F_{\max}-F_{\min})$  of L-2Zn<sup>2+</sup> (10 μM) to Log[PPI] in water solution (HEPES 10 mM, pH = 7.4).  $\lambda_{\text{em}} = 396$  nm.

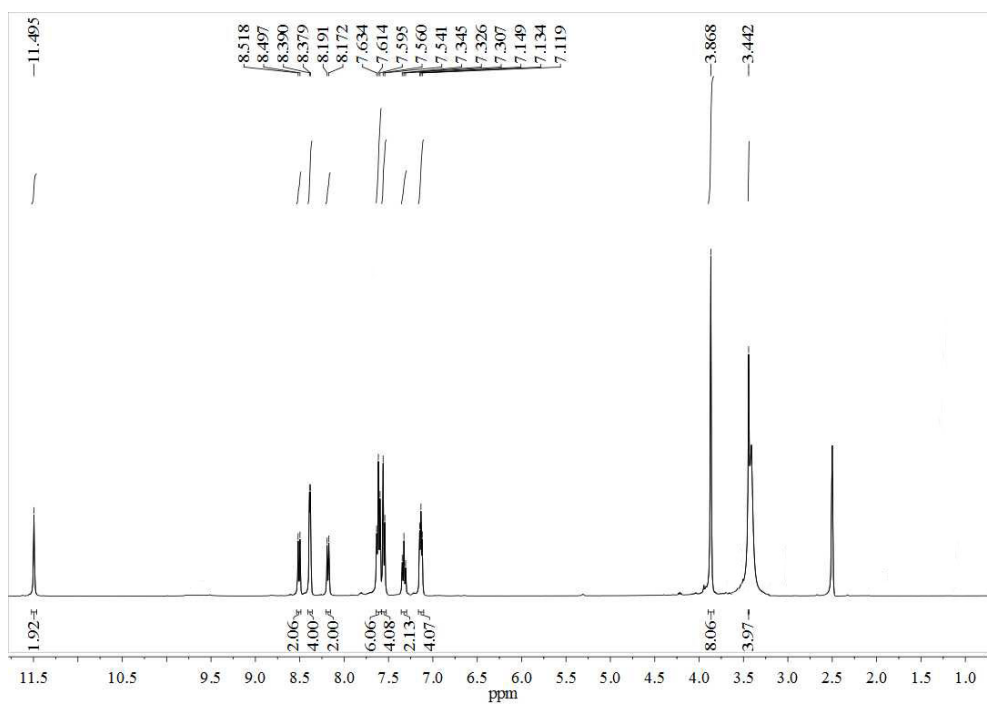

**Fig. S11.**  $^1\text{H}$  NMR spectrum of sensor **L** in  $\text{DMSO-}d_6$ .

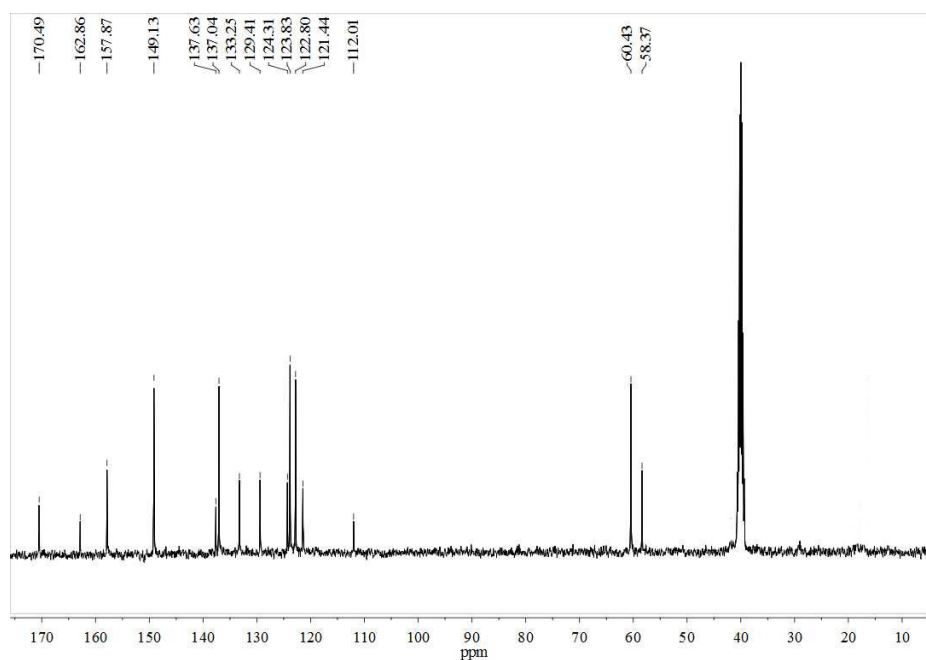

**Fig. S12.**  $^{13}\text{C}$  NMR spectrum of sensor **L** in  $\text{DMSO-}d_6$ .

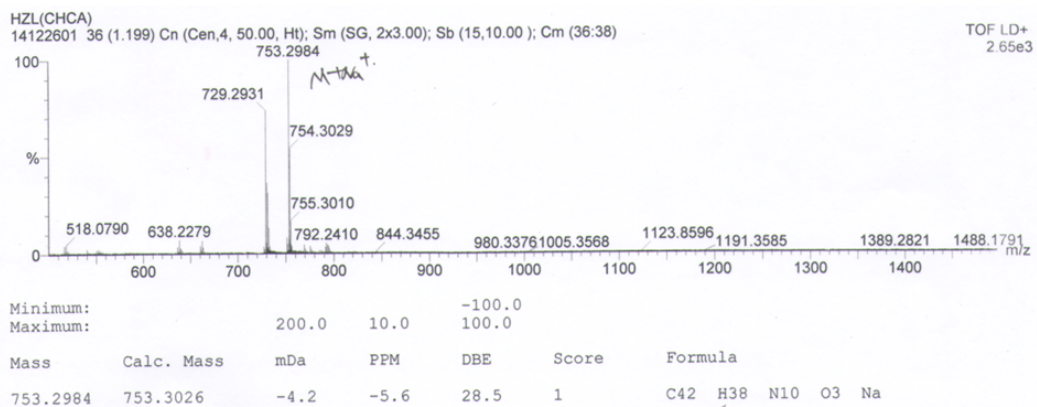

**Fig. S13.** MALDI-TOF-MS (positive) spectrum of sensor of **L**.
